# Supplementary material for: Comparison of Long-Term Pneumonia Risk between Spleen Injury and Non-Spleen Injury after Total Splenectomy—A Population-Based Study
Source: MDPI journal article supplement (doi:10.3390/jpm12020308), 2022-02-18
Supplement: s1 [file s1]

**Table S1.** Risk factors for pneumonia according to spleen injury status, and the effect of spleen injury on the risk of pneumonia.

|                          | Splenectomy due to Injury |         |                     | Splenectomy not Due to an Injury |        |                     | Ratio | Due to Spleen Injury <i>vs.</i> not Due to Spleen Injury (Reference) |          |
|--------------------------|---------------------------|---------|---------------------|----------------------------------|--------|---------------------|-------|----------------------------------------------------------------------|----------|
|                          | Events                    | PYs     | Rate (per 1000 PYs) | Events                           | PYs    | Rate (per 1000 PYs) |       | Adjusted HR <sup>1</sup> (95% CI)                                    | <i>p</i> |
| Overall                  | 1917                      | 123,167 | 15.56               | 720                              | 60,004 | 12.00               | 1.297 | 1.567 (1.427–1.721)                                                  | <0.001   |
| Sex                      |                           |         |                     |                                  |        |                     |       |                                                                      |          |
| Male                     | 1303                      | 67,402  | 19.33               | 567                              | 43,053 | 13.17               | 1.468 | 1.776 (1.618–1.982)                                                  | <0.001   |
| Female                   | 614                       | 55,766  | 11.01               | 153                              | 16,951 | 9.03                | 1.220 | 1.472(1.341–1.615)                                                   | <0.001   |
| Age group (years)        |                           |         |                     |                                  |        |                     |       |                                                                      |          |
| 20–44                    | 192                       | 18,771  | 10.23               | 210                              | 22,769 | 9.22                | 1.109 | 1.340 (1.206–1.475)                                                  | <0.001   |
| 45–64                    | 584                       | 47,811  | 12.21               | 250                              | 22,769 | 10.98               | 1.112 | 1.445 (1.389–1.526)                                                  | <0.001   |
| ≥65                      | 1141                      | 56,586  | 20.16               | 260                              | 14,467 | 17.97               | 1.122 | 1.575 (1.431–1.798)                                                  | <0.001   |
| Insurance premium (NT\$) |                           |         |                     |                                  |        |                     |       |                                                                      |          |
| <18,000                  | 1880                      | 120,752 | 15.57               | 708                              | 15,232 | 46.48               | 0.335 | 0.779 (0.586–1.120)                                                  | 0.275    |
| 18,000–34,999            | 31                        | 1811    | 17.12               | 12                               | 1115   | 10.76               | 1.591 | 1.892 (1.534–2.010)                                                  | <0.001   |
| ≥35,000                  | 6                         | 604     | 9.93                | 0                                | 43,657 | 0.00                |       |                                                                      | 0.896    |
| Season                   |                           |         |                     |                                  |        |                     |       |                                                                      |          |
| Spring                   | 479                       | 26,793  | 17.88               | 209                              | 14,491 | 14.42               | 1.240 | 1.497 (1.368–1.659)                                                  | <0.001   |
| Summer                   | 476                       | 31,193  | 15.26               | 147                              | 15,224 | 9.66                | 1.580 | 1.910 (1.732–2.101)                                                  | <0.001   |
| Autumn                   | 463                       | 35,126  | 13.18               | 154                              | 16,888 | 9.12                | 1.445 | 1.746 (1.584–1.916)                                                  | <0.001   |
| Winter                   | 499                       | 30,056  | 16.60               | 210                              | 13,401 | 15.67               | 1.060 | 1.281 (1.163–1.423)                                                  | <0.001   |
| Urbanization level       |                           |         |                     |                                  |        |                     |       |                                                                      |          |
| 1 (highest)              | 643                       | 43,846  | 14.66               | 161                              | 13,966 | 11.53               | 1.272 | 1.537 (1.382–1.689)                                                  | <0.001   |
| 2                        | 880                       | 55,523  | 15.85               | 314                              | 25,449 | 12.34               | 1.285 | 1.556 (1.420–1.713)                                                  | <0.001   |
| 3                        | 98                        | 7446    | 13.16               | 60                               | 6161   | 9.74                | 1.351 | 1.634 (1.497–1.780)                                                  | <0.001   |
| 4 (lowest)               | 296                       | 16,352  | 18.10               | 185                              | 14,429 | 12.82               | 1.412 | 1.708 (1.526–1.897)                                                  | <0.001   |
| Level of care            |                           |         |                     |                                  |        |                     |       |                                                                      |          |
| Hospital center          | 811                       | 57,652  | 14.07               | 202                              | 16,821 | 12.01               | 1.171 | 1.402 (1.283–1.567)                                                  | <0.001   |
| Regional hospital        | 771                       | 50,948  | 15.13               | 321                              | 29,913 | 10.73               | 1.410 | 1.703 (1.552–1.892)                                                  | <0.001   |
| Local hospital           | 335                       | 14,567  | 23.00               | 197                              | 13,271 | 14.84               | 1.549 | 1.879 (1.700–2.101)                                                  | <0.001   |

<sup>1</sup>The adjusted HRs were calculated using Cox proportional hazards regression with all the variables listed in the table included in the model. CI, confidence interval; HR, hazard ratio; PYs, person-years.

**Table S2.** Factors of pneumonia with/without chest injury among spleen injury by using Cox regression.

| Groups                                   | Population | Events | Events% | Rate (per 1000 PYs) | Adjusted HR | <i>p</i> |
|------------------------------------------|------------|--------|---------|---------------------|-------------|----------|
| Without spleen injury                    | 5681       | 720    | 12.67   | 12.00               | Reference   |          |
| With spleen injury                       | 11,817     | 1917   | 16.22   | 15.56               | 1.567       | <0.001   |
| With spleen injury, without chest injury | 11,665     | 1887   | 16.18   | 15.50               | 1.448       | <0.001   |
| With spleen injury, with chest injury    | 152        | 30     | 19.74   | 21.04               | 2.241       | <0.001   |

**Table S3.** pneumonia with/without chest injury among spleen injury by using Cox regression.

| Groups                                   | Adjusted HR | <i>p</i> |
|------------------------------------------|-------------|----------|
| With spleen injury, without chest injury | Reference   |          |
| With spleen injury, with chest injury    | 1.351       | 0.603    |
